# Supplementary material
Source: Royal Society of Chemistry journal article supplement (doi:10.1039/d6cc01607c)
Supplement: d6cc01607c1.pdf [file d6cc01607c1.pdf]

## **Supporting Information**

### **Pore-Wall Pyridine-N Density Regulation in Covalent Organic Frameworks for Enhanced Gold Capture**

Jun Cao, Meng Li, Hao Wang, Shiyuan Wei, Ruoyan Li, Jinping Xiahou, Jianhan  
Huang\*, Jiawei Li\*, and You-Nian Liu

## Experimental Section

### Materials and reagents

1,3,6,8-Tetra(4-aminophenyl)pyrene (PYTA) (Cat No. 1181502, Leyan, Shanghai, China) and chloroauric acid trihydrate ( $\text{HAuCl}_4 \cdot 3\text{H}_2\text{O}$ ) (Cat No. 1215225, Leyan, Shanghai, China). Terephthalaldehyde (PT), styrene (St), 2-vinylpyridine (2-VPy), and 2-vinylpyrazine (2-VPz) were obtained from Aladdin. *n*-Butanol (*n*-BuOH), *o*-dichlorobenzene (*o*-DCB), dichloromethane (DCM), tetrahydrofuran (THF), methanol (MeOH), acetic acid (HAc), and sodium hydroxide (NaOH) were purchased from Sinopharm Chemical Reagent Co., Ltd. 2,3-Dichloro-5,6-dicyano-1,4-benzoquinone (DDQ) and boron trifluoride diethyl etherate ( $\text{BF}_3 \cdot \text{Et}_2\text{O}$ ) were obtained from Adamas. All other reagents and solvents were purchased from commercial sources and used as received without further purification.

### Characterization

Scanning electron microscopy (SEM) images were acquired on a JSM-7610F Plus microscope at an accelerating voltage of 10 kV. Transmission electron microscopy (TEM) was performed on a JEM-F200 instrument operated at 120 kV. Thermogravimetric analysis (TGA) was carried out on a Mettler Toledo TGA2 under a  $\text{N}_2$  atmosphere from 25 to 800 °C at a heating rate of 10 °C  $\text{min}^{-1}$ . Powder X-ray diffraction (PXRD) patterns were collected on a Bruker D8 Advance diffractometer using Ni-filtered  $\text{Cu K}\alpha$  radiation (40 kV, 100 mA) over the  $2\theta$  range of 2-30° at a scanning rate of 6°  $\text{min}^{-1}$ . Fourier transform infrared (FT-IR) spectra were recorded on a Nicolet iN10 MX microscope FT-IR spectrometer in the range of 4000-500  $\text{cm}^{-1}$ .  $\text{N}_2$  adsorption-desorption isotherms at 77 K were measured on a Micromeritics ASAP 2460 analyzer to evaluate the porosity and textural properties. X-ray photoelectron spectroscopy (XPS) measurements were carried out on an ESCALAB Xi+ spectrometer equipped with an Al  $\text{K}\alpha$  X-ray source. Solid-state  $^{13}\text{C}$  NMR spectra were recorded on a Bruker Avance II 400 MHz spectrometer with a contact time of 2 ms (ramp 100%)

and a recycle delay of 4 s. Metal-ion concentrations were determined using a TAS-990 atomic absorption spectrometer (AAS).

## Synthesis

### Synthesis of Model Compound

A Pyrex glass tube (10 mL) was charged with benzaldehyde (69 mg, 0.65 mmol), aniline (60 mg, 0.65 mmol), styrene (0.68 mmol, 78  $\mu$ L), 2,3-dichloro-5,6-dicyano-1,4-benzoquinone (DDQ) (5.2 mg, 0.02 mmol), and  $\text{BF}_3 \cdot \text{Et}_2\text{O}$  (4  $\mu$ L, 0.03 mmol) in *o*-dichlorobenzene (*o*-DCB)/*n*-BuOH (1.5/1.5 mL). The tube was firstsonicated for 30 minutes to form bulk solid and then flash frozen at 77 K (liquid  $\text{N}_2$  bath) and degassed by three times of freeze-pump-thaw cycles. The internal pressurewas evacuated to  $10^{-3}$  mbar. The tube was sealed and heated at 120  $^\circ\text{C}$  for 1 days. The resulting crystalline solid was collected by filtration, gently washed with THF and MeOH, and dried under vacuum to afford the desired quinoline product in 80% isolated yield

### Synthesis of COF-Q-Ph

PYTA (33.9 mg, 0.06 mmol, 1.0 eq) and PT (16.1 mg, 0.12 mmol, 2.0 eq) were placed in a 10 mL Pyrex tube, followed by addition of a solvent mixture of *o*-dichlorobenzene/*n*-butanol (*o*-DCB/*n*-BuOH, 1:1, v/v; total 3.0 mL). Acetic acid (6 M, 0.30 mL) was then added, and the mixture was sonicated for 5 min until a homogeneous solution was obtained. Subsequently, St (25.0 mg, 0.24 mmol, 4.0 eq), DDQ (3.63 mg, 0.016 mmol, 0.27 eq), and  $\text{BF}_3 \cdot \text{Et}_2\text{O}$  (6  $\mu$ L, 0.048 mmol, 0.80 eq) were added. The reaction mixture was degassed by three freeze-pump-thaw cycles, flame-sealed under vacuum, and heated at 120  $^\circ\text{C}$  for 72 h. After cooling to room temperature, the resulting solid was collected and washed with THF and MeOH. Further purification of the product was carried out using a Soxhlet extractor with THF and methanol for 24 h. Finally, the product was dried under vacuum at 60  $^\circ\text{C}$  for 24 h.

## Synthesis of COF-Q-Py and COF-Q-Pz

COF-Q-Py and COF-Q-Pz were prepared under identical conditions, except that styrene was replaced with 2-VPy (25.23 mg, 0.24 mmol, 4.0 eq) for COF-Q-Py or 2-VPz (25.47 mg, 0.24 mmol, 4.0 eq) for COF-Q-Pz.

## Adsorption isotherm

For adsorption isotherm experiments,  $\text{AuCl}_4^-$  solutions were prepared from  $\text{HAuCl}_4 \cdot 3\text{H}_2\text{O}$  with initial concentrations of 100, 200, 300, 400, and 500  $\text{mg L}^{-1}$ . Typically, 3.0 mg of COF was added to 15.0 mL of  $\text{AuCl}_4^-$  solution and stirred at room temperature for 12 h to reach adsorption equilibrium. After filtration through a 0.22  $\mu\text{m}$  membrane, the equilibrium  $\text{AuCl}_4^-$  concentration ( $C_e$ ) in the filtrate was determined by AAS (TAS-990). The solution pH was not adjusted unless otherwise noted. The equilibrium adsorption capacity ( $q_e$ ,  $\text{mg g}^{-1}$ ) was calculated according to Eq. (1):

$$q_e = \frac{(C_0 - C_e)V}{m} \quad (1)$$

where  $C_0$  ( $\text{mg/L}$ ) and  $C_e$  ( $\text{mg/L}$ ) are the initial and equilibrium concentrations of  $\text{AuCl}_4^-$ , respectively,  $V$  (L) is the solution volume (15.0 mL), and  $m$  (g) is the mass of the adsorbent. The isotherm data were fitted using the Langmuir model (Eq. (2)) and the Freundlich model (Eq. (3)):

$$q_e = \frac{K_L q_m C_e}{1 + K_L C_e} \quad (2)$$

$$q_e = K_F C_e^{\frac{1}{n}} \quad (3)$$

where  $q_m$  ( $\text{mg g}^{-1}$ ) is the maximum adsorption capacity,  $K_L$  ( $\text{L mg}^{-1}$ ) is the Langmuir constant,  $K_F$  is the Freundlich constant, and  $n$  is the heterogeneity factor.

## Adsorption kinetics

For kinetic experiments, 9.0 mg of COF was added to 45.0 mL of  $\text{AuCl}_4^-$  solution prepared from  $\text{HAuCl}_4 \cdot 3\text{H}_2\text{O}$  (250  $\text{mg L}^{-1}$ ). At predetermined time intervals (10, 20, 30, 40, 50, 60, 90, 120, and 180 min), aliquots were withdrawn and immediately filtered through a 0.22  $\mu\text{m}$  membrane. The  $\text{AuCl}_4^-$  concentration in the filtrate was determined by AAS (TAS-990). The kinetic data were fitted by nonlinear regression using the pseudo-first-order (PFO) model (Eq. 4) and pseudo-second-order (PSO) model (Eq. 5):

$$q_t = q_e(1 - e^{-k_1 t}) \quad (4)$$

$$q_t = \frac{k_2 q_e^2 t}{1 + k_2 q_e t} \quad (5)$$

where  $q_t$  (mg g<sup>-1</sup>) is the adsorption capacity at time  $t$ ,  $q_e$  (mg g<sup>-1</sup>) is the equilibrium adsorption capacity, and  $k_1$  (min<sup>-1</sup>) and  $k_2$  (g mg<sup>-1</sup> min<sup>-1</sup>) are the rate constants of the PFO and PSO models, respectively.

### Sorption thermodynamics study

Sorption thermodynamic experiments were carried out for COF-Q-Ph, COF-Q-Py, and COF-Q-Pz. AuCl<sub>4</sub><sup>-</sup> solutions were prepared from HAuCl<sub>4</sub>·3H<sub>2</sub>O with an initial concentration of 250 mg L<sup>-1</sup>. Typically, 3.0 mg of COF was added to 15.0 mL of AuCl<sub>4</sub><sup>-</sup> solution and mixed at 298, 308, and 318 K for 2 h, respectively. After filtration through a 0.22 μm membrane, the equilibrium AuCl<sub>4</sub><sup>-</sup> concentration  $C_e$  in the filtrate was determined by AAS (TAS-990). The equilibrium adsorption capacity  $q_e$  was calculated as described above. The apparent thermodynamic adsorption equilibrium constant  $K_e$  was calculated according to Eq. (6), and the thermodynamic parameters including Gibbs free energy change  $\Delta G$ , enthalpy change  $\Delta H$ , and entropy change  $\Delta S$  were obtained using Eqs. (7) and (8).

$$K_e = \frac{q_e}{C_e} \quad (6)$$

$$\Delta G = -RT \ln K_e \quad (7)$$

$$\ln K_e = \frac{\Delta S}{R} - \frac{\Delta H}{RT} \quad (8)$$

where  $q_e$  is the equilibrium adsorption capacity in mg g<sup>-1</sup>,  $C_e$  is the equilibrium concentration of AuCl<sub>4</sub><sup>-</sup> in mg L<sup>-1</sup>,  $K_e$  is the apparent equilibrium constant in L g<sup>-1</sup>,  $T$  is the absolute temperature in K, and  $R$  is the gas constant 8.314 J mol<sup>-1</sup> K<sup>-1</sup>.  $\Delta H$  and  $\Delta S$  were derived from the slope and intercept of the van't Hoff plot of  $\ln K_e$  versus  $1/T$ , respectively.

### Selectivity tests

**Test 1 (Anion interference):** An aqueous solution containing Na<sub>2</sub>SO<sub>4</sub>, NaCl, Na<sub>2</sub>CO<sub>3</sub>, NaNO<sub>3</sub>, NaOAc, and Na<sub>3</sub>PO<sub>4</sub> was prepared, where the concentration of each

anion salt was 250 ppm.  $\text{AuCl}_4^-$  was introduced into the same solution at 250 ppm. Typically, 3 mg of the sample was added to 15.0 mL of the above solution and stirred at 25 °C. After the reaction, the suspension was filtered through a 0.22  $\mu\text{m}$  syringe filter, and the residual Au concentration in the filtrate was determined by atomic absorption spectrophotometry (AAS).

**Test 2 (Cation interference):** A mixed-ion solution containing  $\text{Na}^+$ ,  $\text{K}^+$ ,  $\text{Zn}^{2+}$ ,  $\text{Pb}^{2+}$ ,  $\text{Ca}^{2+}$ ,  $\text{Cu}^{2+}$ ,  $\text{Al}^{3+}$ ,  $\text{Mg}^{2+}$ ,  $\text{Fe}^{3+}$ , and  $\text{AuCl}_4^-$  was prepared with a concentration of 250 ppm for each ion species. The sorption procedure and Au analysis were identical to those in Test 1.

### **Preparation of CPU leaching solution**

Discarded central processing units (CPUs) were immersed in 20 mL of aqua regia for 48 h to obtain the initial leachate. The leachate was then adjusted to pH 2.4 and filtered through a 0.22  $\mu\text{m}$  syringe filter to afford the final CPU leaching solution used for subsequent experiments.

### **Recycling experiments**

The recyclability of the sample was evaluated by successive adsorption-desorption cycles. Typically, 20 mg of COF-Q-Pz was added to 40 mL of  $\text{AuCl}_4^-$  solution (250 ppm) and stirred at room temperature for 2 h. The solid was collected by filtration and washed with water three times. The adsorbed Au species were then eluted by soaking the solid in a regeneration solution containing thiourea (0.01 mol  $\text{L}^{-1}$ ) and HCl (0.05 mol  $\text{L}^{-1}$ ) for 12 h. After regeneration, the material was filtered and washed with water three times, and then reused for the next cycle under identical conditions.

### **Theoretical calculation**

All structural optimizations and subsequent calculations were performed using periodic density functional theory (DFT) as implemented in the CP2K 2024.3 software package.

The bulk structure of the covalent organic framework (COF) was first fully relaxed. The (001) surface was then cleaved to construct a periodic slab model, with a

vacuum layer of 15 Å added along the z-direction to minimize interactions between periodic images in neighboring cells.

Adsorption sites for the reactant(s) on the COF (001) surface were systematically screened across various possible binding positions. The most favorable adsorption configurations were identified based on the computed adsorption energies.

The adsorption energy was calculated using the formula:

$$E_{ads} = E_{AB} - E_A - E_B$$

Where  $E_{AB}$  is the total energy of the adsorbate–substrate complex,  $E_A$  is the energy of the clean COF slab, and  $E_B$  is the energy of the adsorbate in the gas phase.

The computational settings were as follows: the revPBE generalized gradient approximation (GGA) functional was employed to describe electron exchange and correlation. Goedecker–Teter–Hutter (GTH) pseudopotentials were used together with the DZVP-MOLOPT-SR-GTH double- $\zeta$  valence plus polarization basis set. Dispersion corrections were included via the DFT-D3 method (Grimme's D3 scheme with zero damping). The orbital transformation (OT) minimizer was adopted for improved SCF convergence during geometry optimizations. The value of cutoff and rel\_cutoff was set to 500 Ry and 50 Ry, respectively.

Harmonic vibrational frequencies were computed on the optimized geometries to obtain ZPE corrections and vibrational entropies for free-energy evaluations. Gibbs free energies were computed using the Shermo program.

Post-processing analyses of the electronic structure were carried out with Multiwfn version 3.8. This included calculation of the total and partial density of states (DOS), charge density difference distributions, and atomic charge analysis employing the CM5 charge model. Visualization of the crystal structures and isosurface representations of the charge density difference as well as DOS-projected quantities were performed using the VESTA software.

## Supporting Figures and Tables

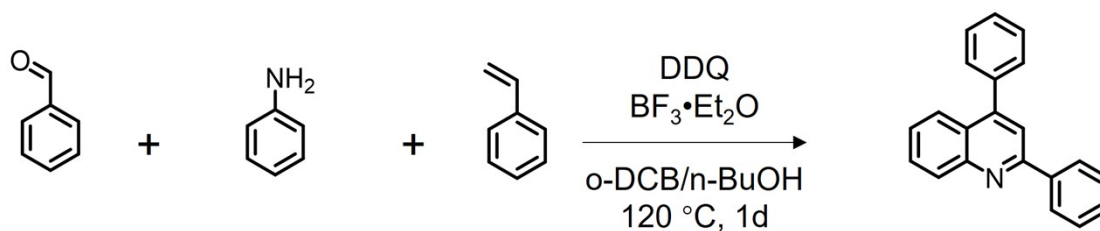

Scheme S1. Synthesis of the model compound.

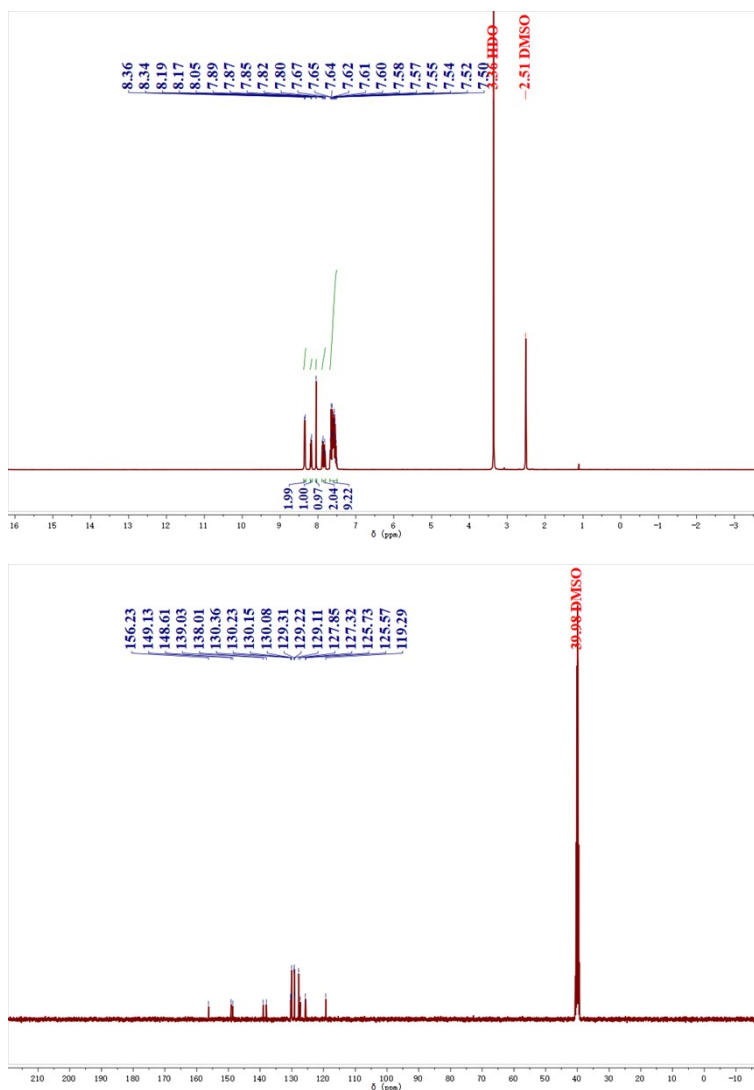

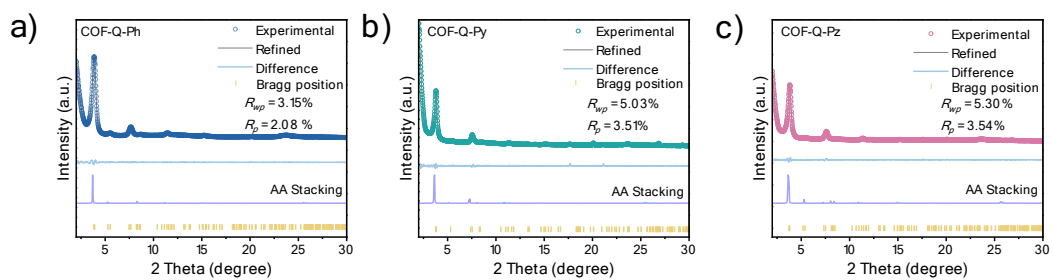

Fig. S2. Experimental and Pawley-refined PXRD patterns of (a) COF-Q-Ph, (b) COF-Q-Py, and (c) COF-Q-Pz.

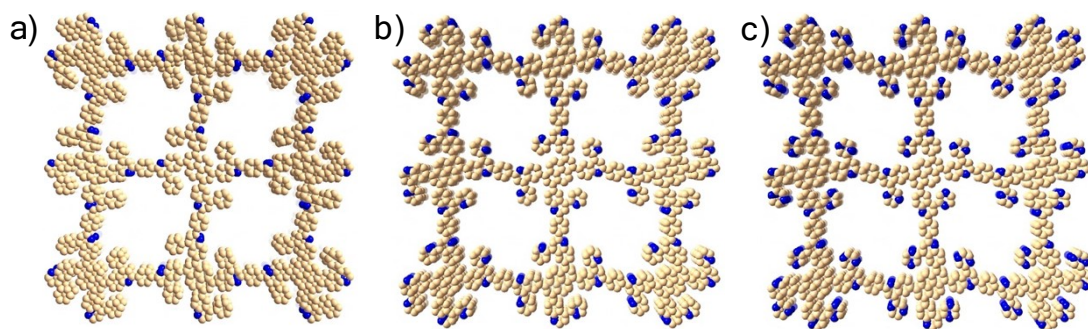

Fig. S3. AA stacking model of (a) COF-Q-Ph, (b) COF-Q-Py, and (c) COF-Q-Pz.

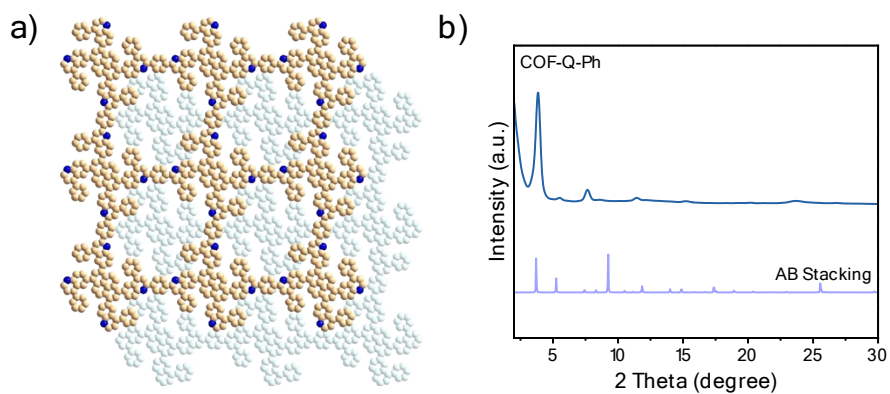

Fig. S4. (a) AB stacking model of COF-Q-Ph and the experimental and simulated (b) PXRD patterns.

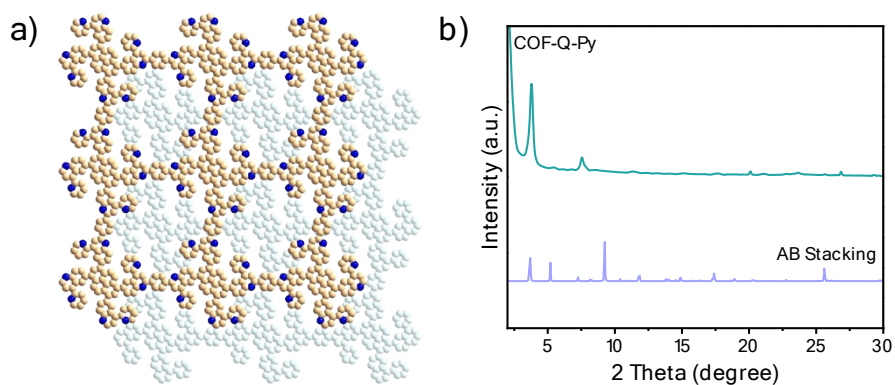

Fig. S5. (a) AB stacking model of COF-Q-Py and the experimental and simulated (b) PXRD patterns.

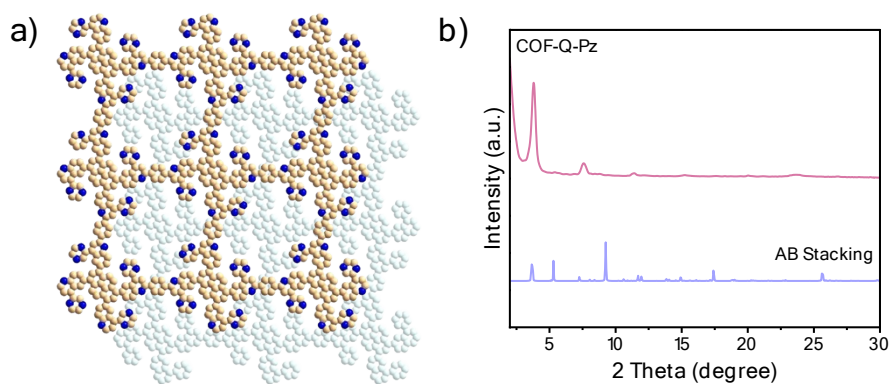

Fig. S6. (a) AB stacking model of COF-Q-Pz and the experimental and simulated (b) PXRD patterns.

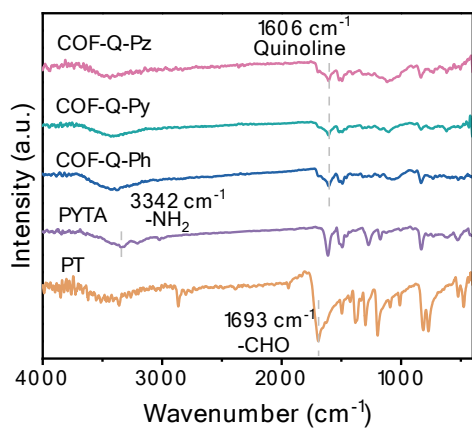

Fig. S7. FT-IR spectra of PT, PYTA, COF-Q-Ph, COF-Q-Py, and COF-Q-Pz.

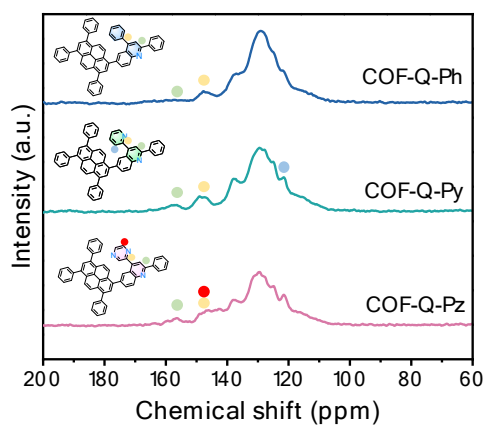

Fig. S8. Solid-state  $^{13}\text{C}$  CP/MAS NMR spectra of COF-Q-Ph, COF-Q-Py, and COF-Q-Pz.

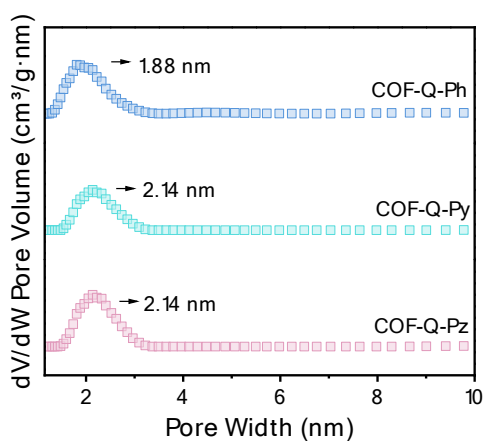

Fig. S9. Pore size distributions of COF-Q-Ph, COF-Q-Py, and COF-Q-Pz.

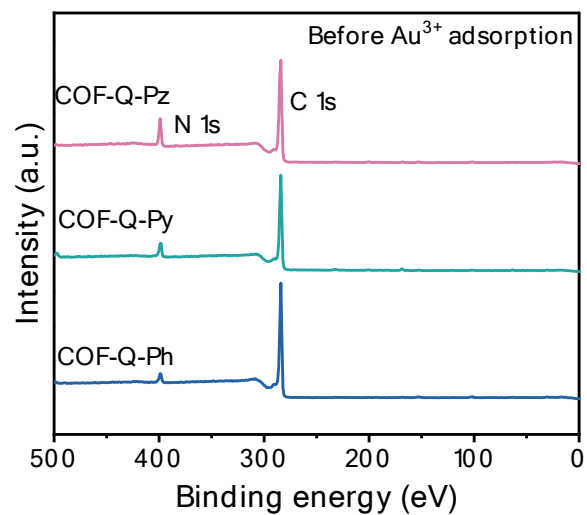

Fig. S10. XPS survey spectra of the COFs before  $\text{AuCl}_4^-$  adsorption.

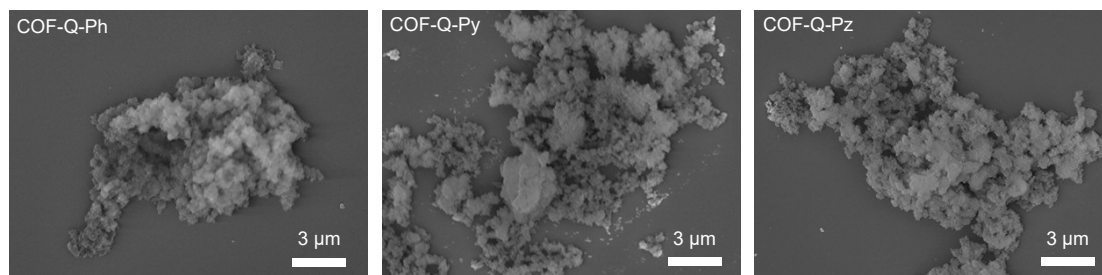

Fig. S11. FE-SEM images of COF-Q-Ph, COF-Q-Py, and COF-Q-Pz.

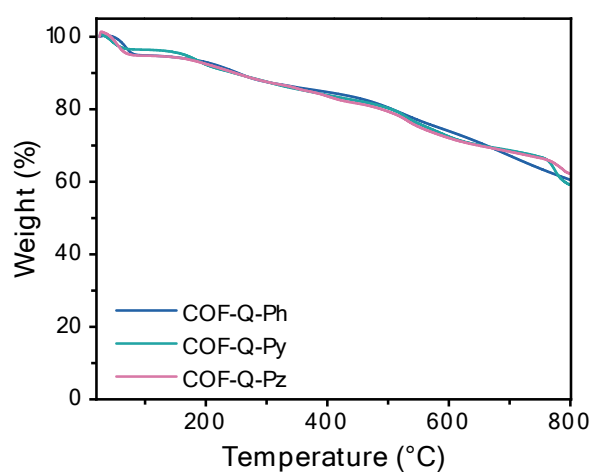

Fig. S12. TGA curves of COF-Q-Ph, COF-Q-Py and COF-Q-Pz under  $\text{N}_2$  atmosphere.

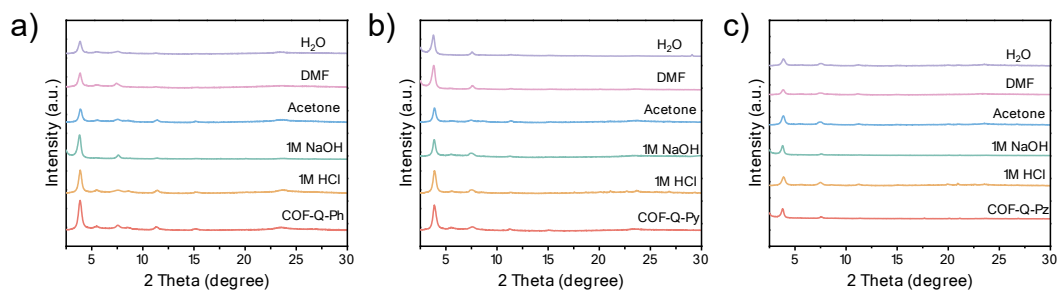

Fig. S13. PXRD after different treatments of (a) COF-Q-Ph, (b) COF-Q-Py, and (c) COF-Q-Pz.

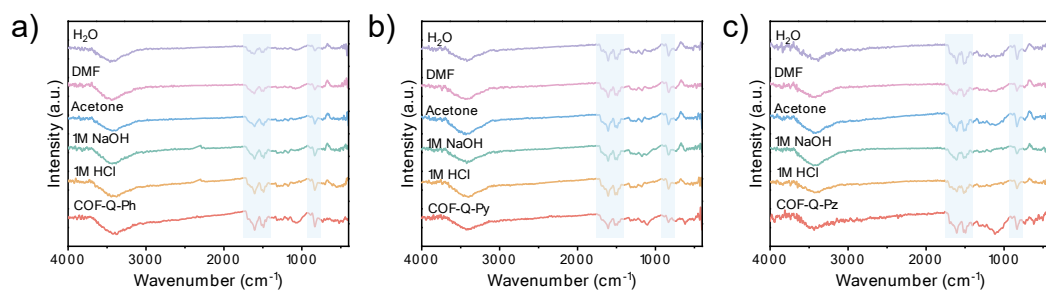

Fig. S14. FT-IR spectra of (a) COF-Q-Ph, (b) COF-Q-Py, and (c) COF-Q-Pz after treatment in various conditions.

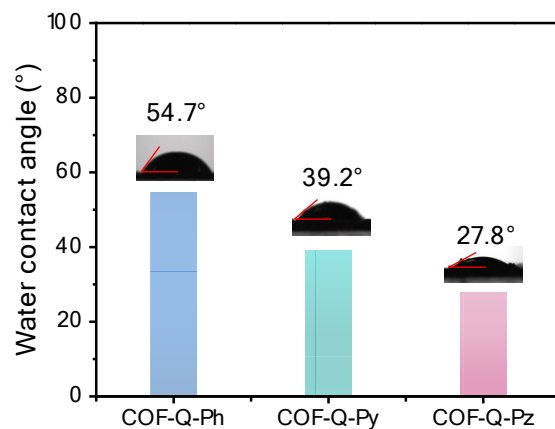

Fig. S15. Water contact angles of COF-Q-Ph, COF-Q-Py, and COF-Q-Pz.

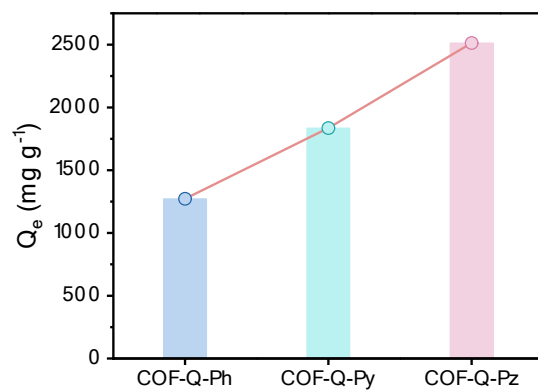

Fig. S16. Comparison of the maximum AuCl<sub>4</sub><sup>-</sup> adsorption capacities for COF-Q-Ph, COF-Q-Py, and COF-Q-Pz.

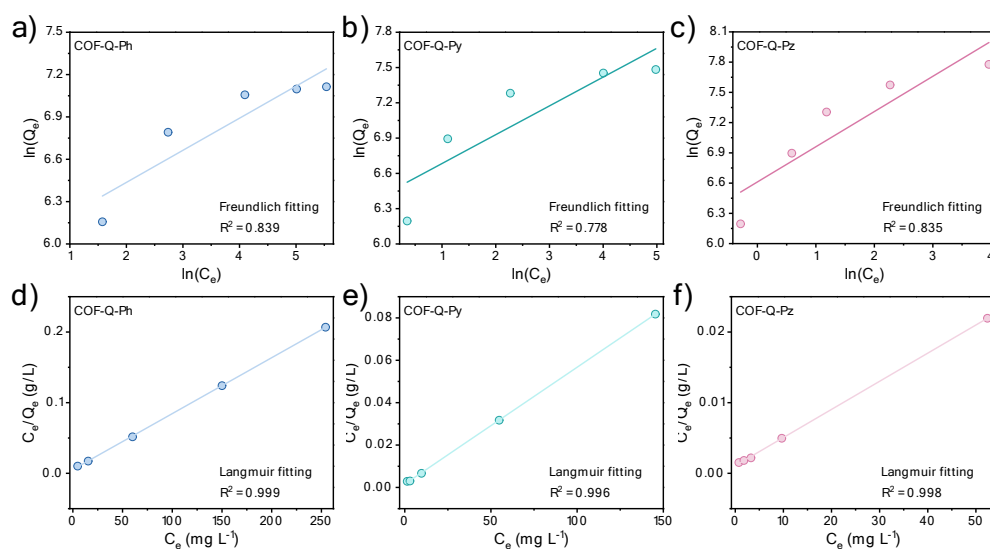

Fig. S17. (a-c) Freundlich and (d-f) Langmuir adsorption isotherm fitting of AuCl<sub>4</sub><sup>-</sup> on COF-Q-Ph, COF-Q-Py and COF-Q-Pz.

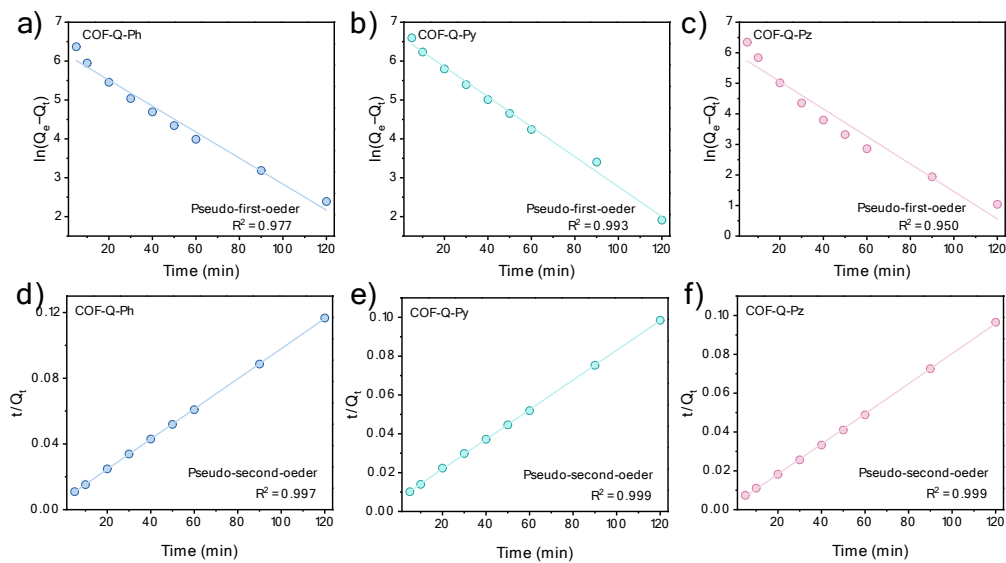

Fig. S18. (a-c) Pseudo-first-order and (d-f) Pseudo-second-order  $\text{AuCl}_4^-$  adsorption kinetic plots of COF-Q-Ph, COF-Q-Py and COF-Q-Pz.

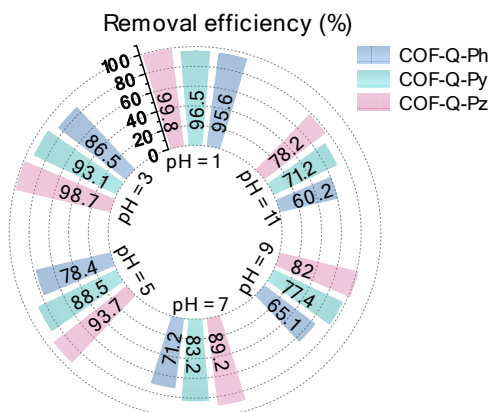

Fig. S19.  $\text{AuCl}_4^-$  removal efficiencies of COF-Q-Ph, COF-Q-Py and COF-Q-Pz at different pH values.

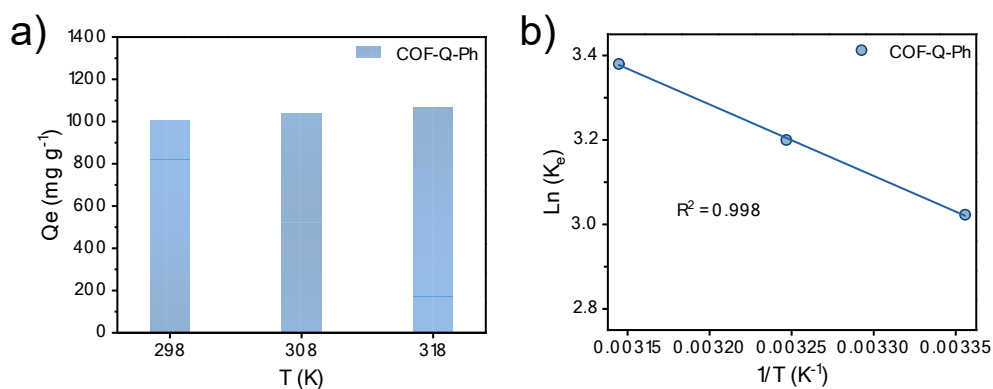

Fig. S20. (a) The adsorption amount of  $\text{AuCl}_4^-$  of COF-Q-Ph at different temperatures and (b) the corresponding linear fitting model.

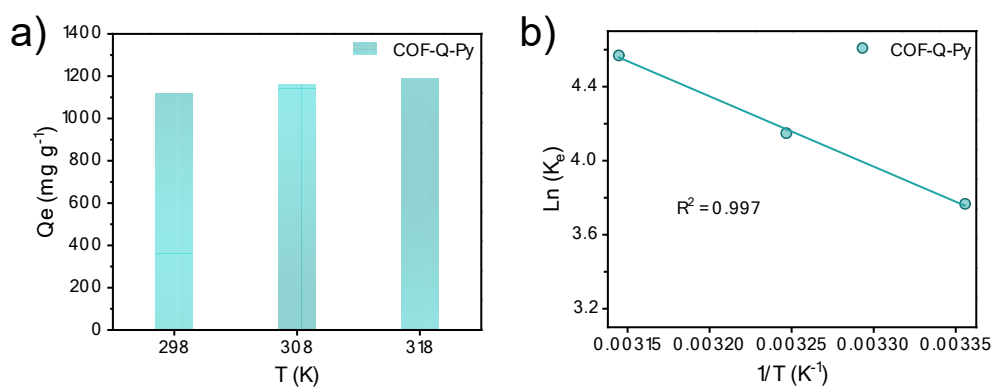

Fig. S21. (a) The adsorption amount of  $\text{AuCl}_4^-$  of COF-Q-Py at different temperatures and (b) the corresponding linear fitting model.

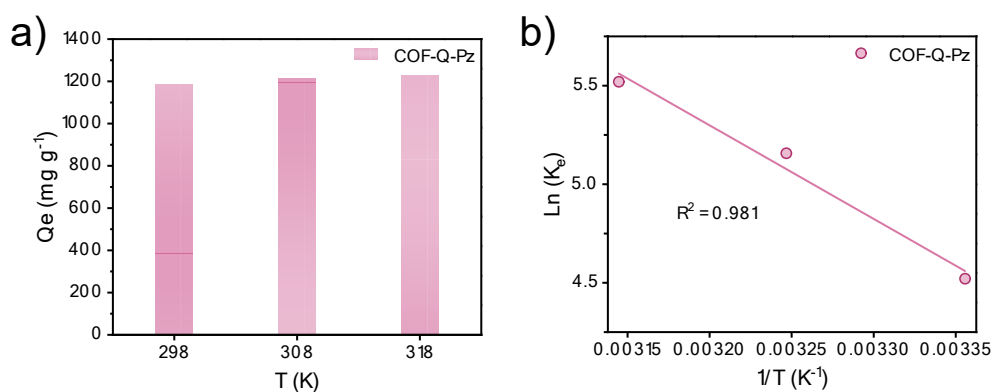

Fig. S22. (a) The adsorption amount of  $\text{AuCl}_4^-$  of COF-Q-Pz at different temperatures and (b) the corresponding linear fitting model.

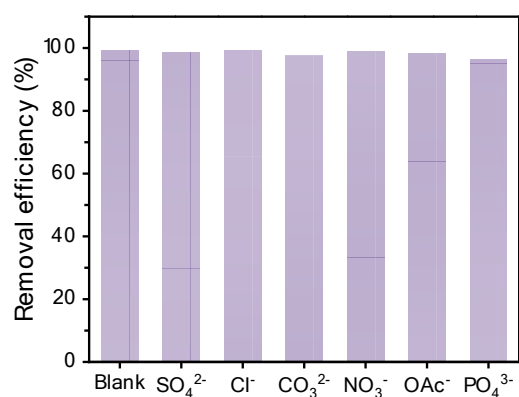

Fig. S23. AuCl<sub>4</sub><sup>-</sup> removal efficiencies of COF-Q-Pz in the presence of various competing anions.

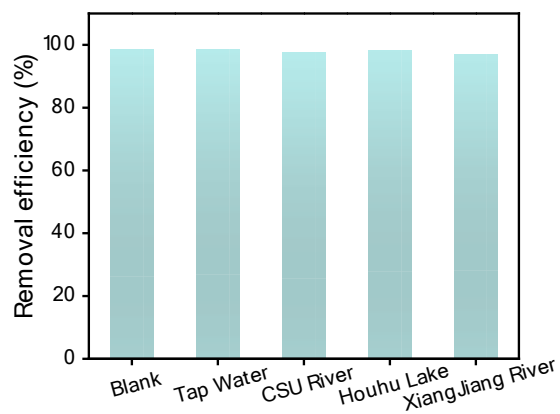

Fig. S24. Recovery of AuCl<sub>4</sub><sup>-</sup> by COF-Q-Pz from tap water, CSU River, Houhu Lake and Xiangjiang River.

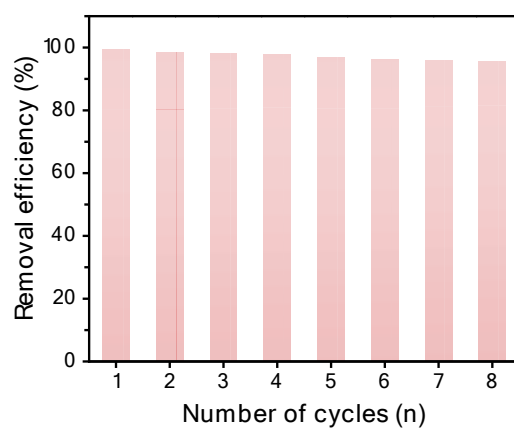

Fig. S25. AuCl<sub>4</sub><sup>-</sup> removal efficiencies of COF-Q-Pz over eight adsorption-desorption cycles.

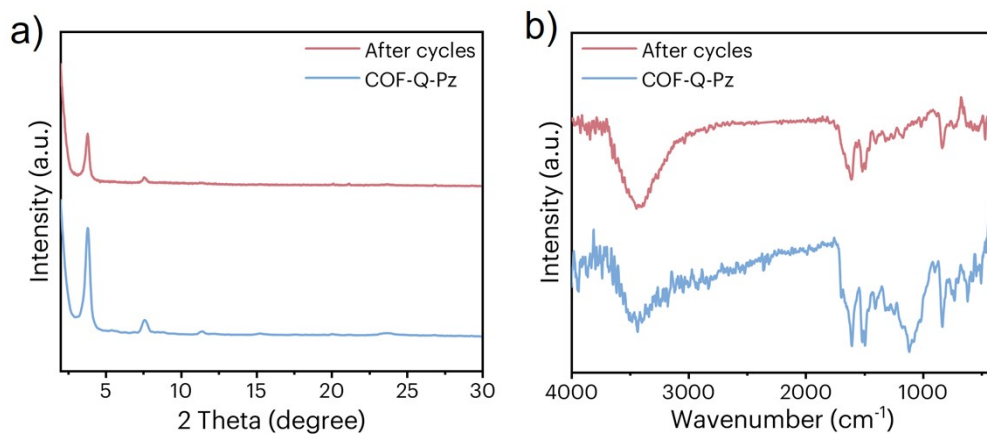

Fig. S26. (a) PXRD patterns and (b) FT-IR spectra of COF-Q-Pz before and after repeated adsorption-desorption cycles.

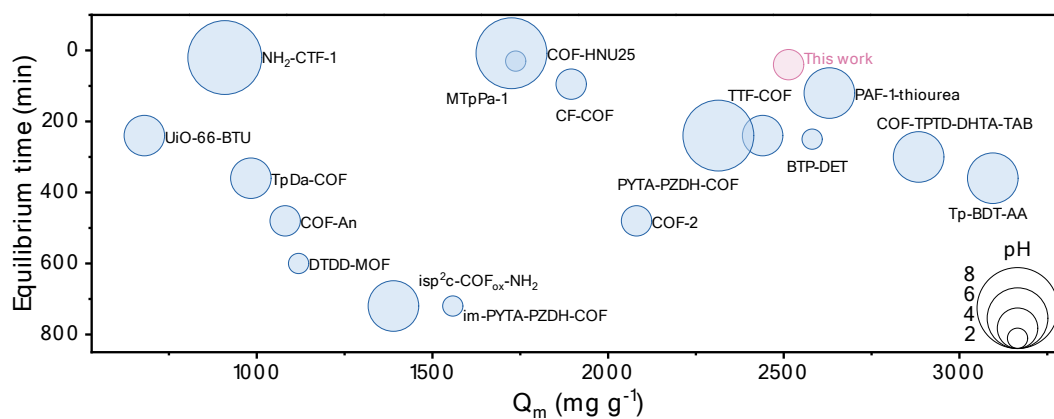

Fig. S27. Comparison of the adsorption capacity and equilibrium time of COF-Q-Pz with previously reported porous adsorbents for  $\text{AuCl}_4^-$  capture.

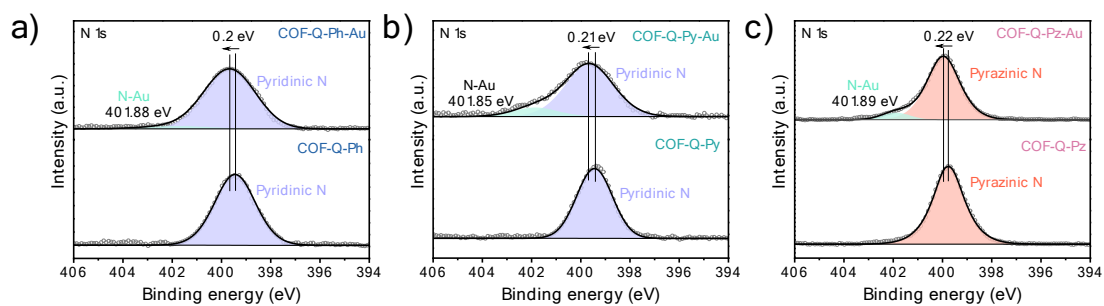

Fig. S28. N 1s XPS spectra of COF-Q-Ph, COF-Q-Py and COF-Q-Pz before and after  $\text{AuCl}_4^-$  adsorption.

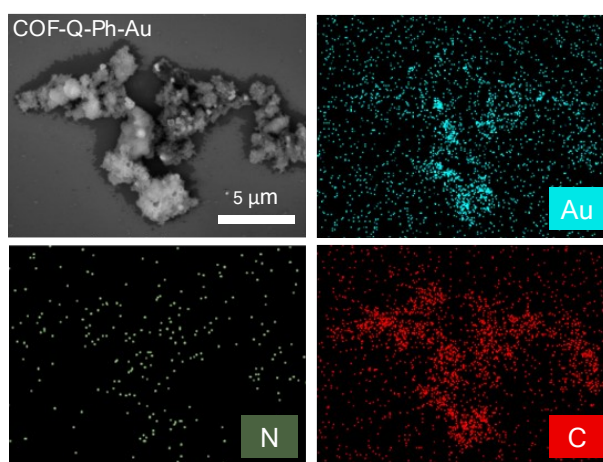

Fig. S29. SEM image and the corresponding EDS mapping of COF-Q-Ph after  $\text{AuCl}_4^-$  adsorption.

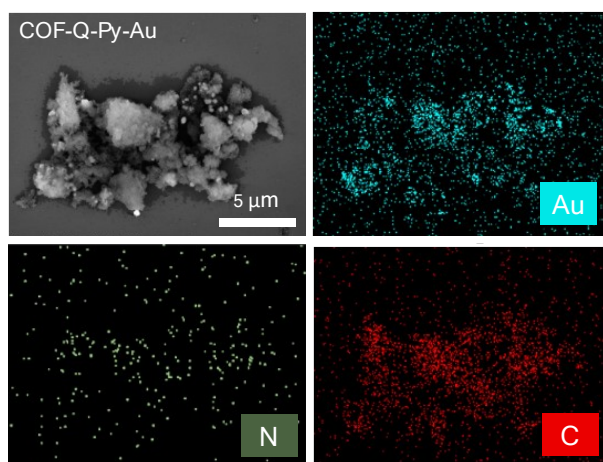

Fig. S30. SEM image and the corresponding EDS mapping of COF-Q-Py after  $\text{AuCl}_4^-$  adsorption.

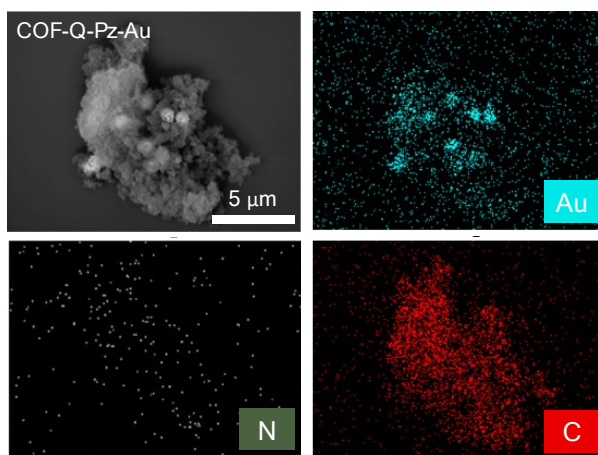

Fig. S31. SEM image and the corresponding EDS mapping of COF-Q-Pz after  $\text{AuCl}_4^-$  adsorption.

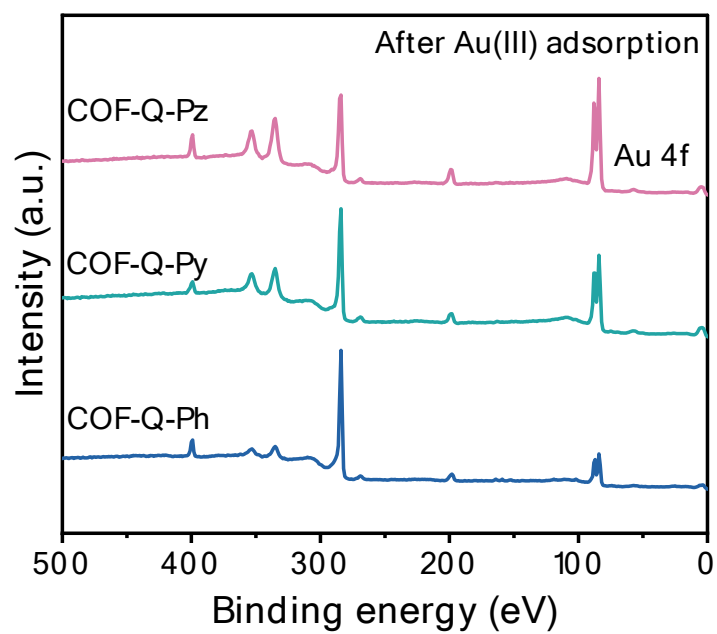

Fig. S32. XPS survey spectra of the COFs after  $\text{AuCl}_4^-$  adsorption.

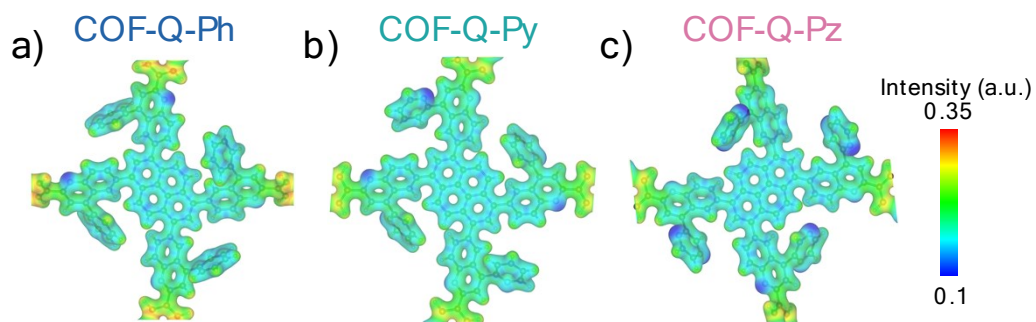

Fig. S33. Electrostatic potential maps of (a) COF-Q-Ph, (b) COF-Q-Py, and (c) COF-Q-Pz.

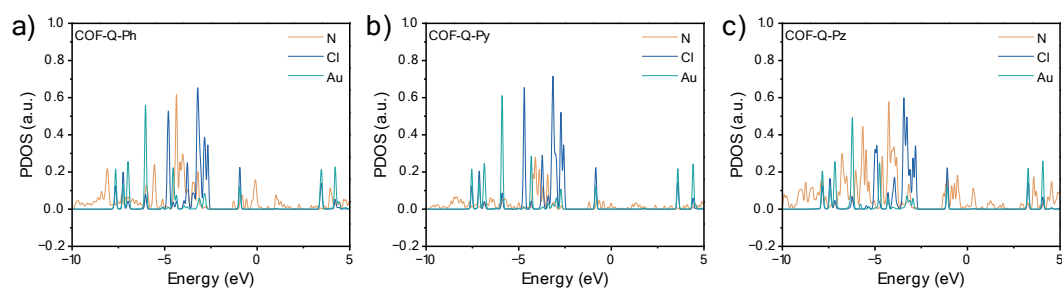

Fig. S34. Projected density of states (PDOS) of AuCl<sub>4</sub><sup>-</sup> adsorbed on COF-Q-Ph, COF-Q-Py, and COF-Q-Pz. (a–c) Element-resolved PDOS of N, Cl, and Au for the corresponding adsorption systems.

Table S1. Atomic coordinates for the unit cell of COF-Q-Ph.

| Space group: P2/M                                                                         |          |          |         |      |          |          |         |
|-------------------------------------------------------------------------------------------|----------|----------|---------|------|----------|----------|---------|
| $a = b = 23.8149 \text{ \AA}, c = 3.4823 \text{ \AA}, \alpha = \beta = \gamma = 90^\circ$ |          |          |         |      |          |          |         |
| Atom                                                                                      | X (Å)    | Y (Å)    | Z (Å)   | Atom | X (Å)    | Y (Å)    | Z (Å)   |
| C1                                                                                        | 0.654672 | 10.70408 | 1.74115 | N24  | 12.1818  | 20.15598 | 1.74115 |
| C2                                                                                        | 1.413652 | 11.85649 | 1.74115 | C25  | 11.20896 | 21.08214 | 1.74115 |
| C3                                                                                        | 0.740405 | 13.05938 | 1.74115 | C26  | 11.56475 | 22.48079 | 1.74115 |
| C4                                                                                        | 2.815874 | 11.82124 | 1.74115 | C27  | 12.90887 | 22.86421 | 1.74115 |
| N5                                                                                        | 3.518651 | 12.95364 | 1.74115 | C28  | 10.56619 | 23.4441  | 1.74115 |
| C6                                                                                        | 4.871576 | 12.98103 | 1.74115 | C29  | 14.19535 | 12.92982 | 1.74115 |
| C7                                                                                        | 5.620316 | 11.80743 | 1.74115 | C30  | 13.29586 | 13.95744 | 1.74115 |
| C8                                                                                        | 7.024443 | 11.90554 | 1.74115 | C31  | 13.94553 | 3.115942 | 1.74115 |
| C9                                                                                        | 7.693403 | 13.11344 | 1.74115 | C32  | 14.32014 | 4.436478 | 1.74115 |
| C10                                                                                       | 6.899653 | 14.2475  | 1.74115 | C33  | 20.30054 | 13.1775  | 1.74115 |
| C11                                                                                       | 5.512673 | 14.18439 | 1.74115 | C34  | 18.89284 | 13.22465 | 1.74115 |
| C12                                                                                       | 9.114915 | 13.23227 | 1.74115 | C35  | 8.102543 | 19.08121 | 1.74115 |
| C13                                                                                       | 10.04441 | 12.1818  | 1.74115 | C36  | 7.614338 | 17.79306 | 1.74115 |
| C14                                                                                       | 11.44282 | 12.43733 | 1.74115 | C37  | 6.244267 | 17.52872 | 1.74115 |
| C15                                                                                       | 11.91721 | 13.74644 | 1.74115 | C38  | 5.325964 | 18.55252 | 1.74115 |
| C16                                                                                       | 10.99605 | 14.80334 | 1.74115 | C39  | 5.779876 | 19.83924 | 1.74115 |
| C17                                                                                       | 9.635509 | 14.49613 | 1.74115 | C40  | 7.151138 | 20.09858 | 1.74115 |
| C18                                                                                       | 11.3347  | 16.15531 | 1.74115 | C41  | 18.27341 | 14.4766  | 1.74115 |
| C19                                                                                       | 12.65619 | 16.6178  | 1.74115 | C42  | 16.87714 | 14.63854 | 1.74115 |
| C20                                                                                       | 12.93316 | 17.95405 | 1.74115 | C43  | 16.29106 | 15.87596 | 1.74115 |
| C21                                                                                       | 11.89149 | 18.86235 | 1.74115 | C44  | 17.09553 | 16.98693 | 1.74115 |
| C22                                                                                       | 10.54548 | 18.4363  | 1.74115 | C45  | 18.48393 | 16.85785 | 1.74115 |
| C23                                                                                       | 10.30542 | 17.09172 | 1.74115 | C46  | 19.0643  | 15.61734 | 1.74115 |

Table S2. Atomic coordinates for the unit cell of COF-Q-Py.

| Space group: P2/M                                                                                 |          |         |          |      |          |         |          |
|---------------------------------------------------------------------------------------------------|----------|---------|----------|------|----------|---------|----------|
| a = 4.3550 Å, b = 3.4768 Å, c = 23.7619 Å, $\alpha = \gamma = 90^\circ$ , $\beta = 87.7327^\circ$ |          |         |          |      |          |         |          |
| Atom                                                                                              | X (Å)    | Y (Å)   | Z (Å)    | Atom | X (Å)    | Y (Å)   | Z (Å)    |
| C1                                                                                                | -36.8112 | -1.7384 | 24.46515 | N24  | -26.7273 | -1.7384 | 35.83699 |
| C2                                                                                                | -35.5896 | -1.7384 | 25.15895 | C25  | -25.7718 | -1.7384 | 34.87178 |
| C3                                                                                                | -34.3969 | -1.7384 | 24.41932 | C26  | -24.3435 | -1.7384 | 35.24813 |
| C4                                                                                                | -35.5516 | -1.7384 | 26.56105 | C27  | -23.9728 | -1.7384 | 36.59965 |
| N5                                                                                                | -34.3576 | -1.7384 | 27.20903 | C28  | -23.3398 | -1.7384 | 34.26773 |
| C6                                                                                                | -34.2677 | -1.7384 | 28.56151 | C29  | -34.0725 | -1.7384 | 37.87923 |
| C7                                                                                                | -35.4364 | -1.7384 | 29.36026 | C30  | -33.0382 | -1.7384 | 36.96152 |
| C8                                                                                                | -35.2781 | -1.7384 | 30.75619 | C31  | 27.9869  | 1.7384  | 13.96044 |
| C9                                                                                                | -34.0169 | -1.7384 | 31.37829 | C32  | 29.33951 | 1.7384  | 14.33774 |
| C10                                                                                               | -32.885  | -1.7384 | 30.54083 | C33  | 14.20597 | 1.7384  | 20.17432 |
| C11                                                                                               | -33.0074 | -1.7384 | 29.15416 | C34  | 14.18668 | 1.7384  | 18.77032 |
| C12                                                                                               | -33.8529 | -1.7384 | 32.7963  | C35  | 19.99609 | 1.7384  | 8.016065 |
| C13                                                                                               | -34.9109 | -1.7384 | 33.74963 | C36  | 18.68303 | 1.7384  | 7.514824 |
| C14                                                                                               | -34.6249 | -1.7384 | 35.14081 | C37  | 18.45345 | 1.7384  | 6.139556 |
| C15                                                                                               | -33.277  | -1.7384 | 35.58744 | C38  | 19.53128 | 1.7384  | 5.257931 |
| C16                                                                                               | -32.2089 | -1.7384 | 34.6474  | C39  | 20.8268  | 1.7384  | 5.771994 |
| C17                                                                                               | -32.5445 | -1.7384 | 33.28923 | N40  | 21.02648 | 1.7384  | 7.117107 |
| C18                                                                                               | -30.8212 | -1.7384 | 34.97602 | C41  | 39.79772 | 1.7384  | 18.10833 |
| C19                                                                                               | -30.3463 | -1.7384 | 36.29715 | C42  | 39.91628 | 1.7384  | 16.7105  |
| C20                                                                                               | -28.981  | -1.7384 | 36.57876 | C43  | 41.17413 | 1.7384  | 16.10811 |
| C21                                                                                               | -28.0502 | -1.7384 | 35.54066 | C44  | 42.32008 | 1.7384  | 16.89903 |
| C22                                                                                               | -28.4823 | -1.7384 | 34.19365 | C45  | 42.1843  | 1.7384  | 18.28594 |
| C23                                                                                               | -29.8616 | -1.7384 | 33.94694 | N46  | 40.94688 | 1.7384  | 18.84986 |

Table S3. Atomic coordinates for the unit cell of COF-Q-Pz.

| Space group: P2/M                                                                                                                         |          |         |          |      |          |         |          |
|-------------------------------------------------------------------------------------------------------------------------------------------|----------|---------|----------|------|----------|---------|----------|
| $a = 24.3552 \text{ \AA}$ , $b = 3.4738 \text{ \AA}$ , $c = 23.7580 \text{ \AA}$ , $\alpha = \gamma = 90^\circ$ , $\beta = 87.7327^\circ$ |          |         |          |      |          |         |          |
| Atom                                                                                                                                      | X (Å)    | Y (Å)   | Z (Å)    | Atom | X (Å)    | Y (Å)   | Z (Å)    |
| C1                                                                                                                                        | -36.7886 | -1.7369 | 24.46337 | N24  | -26.6952 | -1.7369 | 35.83201 |
| C2                                                                                                                                        | -35.5653 | -1.7369 | 25.15396 | C25  | -25.7404 | -1.7369 | 34.86604 |
| C3                                                                                                                                        | -34.3744 | -1.7369 | 24.41162 | C26  | -24.312  | -1.7369 | 35.2416  |
| C4                                                                                                                                        | -35.5239 | -1.7369 | 26.55601 | C27  | -23.9411 | -1.7369 | 36.59333 |
| N5                                                                                                                                        | -34.3282 | -1.7369 | 27.20197 | C28  | -23.3092 | -1.7369 | 34.26045 |
| C6                                                                                                                                        | -34.2361 | -1.7369 | 28.55441 | C29  | -34.0424 | -1.7369 | 37.87313 |
| C7                                                                                                                                        | -35.4036 | -1.7369 | 29.35467 | C30  | -33.0071 | -1.7369 | 36.95631 |
| C8                                                                                                                                        | -35.2446 | -1.7369 | 30.75008 | C31  | 27.99789 | 1.7369  | 13.95672 |
| C9                                                                                                                                        | -33.9836 | -1.7369 | 31.37182 | C32  | 29.35055 | 1.7369  | 14.33276 |
| C10                                                                                                                                       | -32.8519 | -1.7369 | 30.53358 | C33  | 14.21857 | 1.7369  | 20.16746 |
| C11                                                                                                                                       | -32.9751 | -1.7369 | 29.14647 | C34  | 14.1966  | 1.7369  | 18.76398 |
| C12                                                                                                                                       | -33.8202 | -1.7369 | 32.79002 | C35  | 20.00461 | 1.7369  | 8.017084 |
| C13                                                                                                                                       | -34.8787 | -1.7369 | 33.74245 | C36  | 18.6934  | 1.7369  | 7.512382 |
| C14                                                                                                                                       | -34.5936 | -1.7369 | 35.13406 | N37  | 18.47445 | 1.7369  | 6.172046 |
| C15                                                                                                                                       | -33.2457 | -1.7369 | 35.58203 | C38  | 19.50674 | 1.7369  | 5.291784 |
| C16                                                                                                                                       | -32.177  | -1.7369 | 34.64242 | C39  | 20.81363 | 1.7369  | 5.773222 |
| C17                                                                                                                                       | -32.5121 | -1.7369 | 33.2838  | N40  | 21.02945 | 1.7369  | 7.114507 |
| C18                                                                                                                                       | -30.7892 | -1.7369 | 34.97121 | C41  | 39.80542 | 1.7369  | 18.09832 |
| C19                                                                                                                                       | -30.314  | -1.7369 | 36.29279 | C42  | 39.92568 | 1.7369  | 16.70101 |
| C20                                                                                                                                       | -28.9488 | -1.7369 | 36.57434 | N43  | 41.15156 | 1.7369  | 16.11631 |
| C21                                                                                                                                       | -28.0182 | -1.7369 | 35.53597 | C44  | 42.28497 | 1.7369  | 16.86173 |
| C22                                                                                                                                       | -28.4508 | -1.7369 | 34.18899 | C45  | 42.18655 | 1.7369  | 18.25097 |
| C23                                                                                                                                       | -29.8295 | -1.7369 | 33.94186 | N46  | 40.95807 | 1.7369  | 18.8314  |

Table S4. Elemental analysis of COF-Q-Ph, COF-Q-Py, and COF-Q-Pz.

| Sample   | C (wt%) | H (wt%) | N (wt%) |
|----------|---------|---------|---------|
| COF-Q-Ph | 85.42   | 4.75    | 4.92    |
| COF-Q-Py | 81.28   | 4.41    | 9.71    |
| COF-Q-Pz | 77.15   | 4.18    | 14.42   |

Table S5. Langmuir and Freundlich isotherm parameters for  $\text{AuCl}_4^-$  adsorption on COF-Q-Ph, COF-Q-Py, and COF-Q-Pz.

|          | Langmuir        |                      |       | Freundlich                           |       |       |
|----------|-----------------|----------------------|-------|--------------------------------------|-------|-------|
|          | $K_L$<br>(L/mg) | $q_{\max}$<br>(mg/g) | $R^2$ | $K_F$<br>(mg/g)(L/mg) <sup>1/n</sup> | 1/n   | $R^2$ |
| COF-Q-Ph | 0.148           | 1263.1               | 0.999 | 395.9                                | 0.227 | 0.839 |
| COF-Q-Py | 0.344           | 1814.3               | 0.996 | 625.8                                | 0.245 | 0.778 |
| COF-Q-Pz | 0.366           | 2512.2               | 0.998 | 743.5                                | 0.349 | 0.835 |

Table S6. Kinetic parameters for  $\text{AuCl}_4^-$  adsorption on COF-Q-Ph, COF-Q-Py, and COF-Q-Pz based on pseudo-first-order and pseudo-second-order models.

|          | pseudo-first-order models     |       | pseudo-second-order models                        |       |
|----------|-------------------------------|-------|---------------------------------------------------|-------|
|          | $k_1$<br>(min <sup>-1</sup> ) | $R^2$ | $k_2$<br>(g·mg <sup>-1</sup> ·min <sup>-1</sup> ) | $R^2$ |
| COF-Q-Ph | 0.0334                        | 0.977 | $1.44 \times 10^{-4}$                             | 0.997 |
| COF-Q-Py | 0.0386                        | 0.993 | $0.99 \times 10^{-4}$                             | 0.999 |
| COF-Q-Pz | 0.0450                        | 0.950 | $2.51 \times 10^{-4}$                             | 0.998 |

Table S7. Thermodynamic parameters for AuCl<sub>4</sub><sup>-</sup> adsorption on COF-Q-Ph, COF-Q-Py, and COF-Q-Pz at different temperatures.

| Adsorbent | T (K) | lnK <sub>e</sub> | ΔG (kJ mol <sup>-1</sup> ) | ΔH (kJ mol <sup>-1</sup> ) | ΔS (J mol <sup>-1</sup> K <sup>-1</sup> ) |
|-----------|-------|------------------|----------------------------|----------------------------|-------------------------------------------|
| COF-Q-Ph  | 298   | 3.023            | -7.48                      | 14.05                      | 72.26                                     |
|           | 308   | 3.200            | -8.21                      |                            |                                           |
|           | 318   | 3.380            | -8.93                      |                            |                                           |
| COF-Q-Py  | 298   | 3.767            | -9.31                      | 31.56                      | 137.14                                    |
|           | 308   | 4.149            | -10.68                     |                            |                                           |
|           | 318   | 4.569            | -12.05                     |                            |                                           |
| COF-Q-Pz  | 298   | 4.521            | -11.34                     | 39.55                      | 170.63                                    |
|           | 308   | 5.162            | -13.22                     |                            |                                           |
|           | 318   | 5.522            | -14.75                     |                            |                                           |

Table S8. Comparison of AuCl<sub>4</sub><sup>-</sup> adsorption performance of COF-Q-Pz with other reported adsorbents.

| Adsorbent                                             | pH  | Equilibrium time (min) | q <sub>max</sub> (mg/g) | Ref.      |
|-------------------------------------------------------|-----|------------------------|-------------------------|-----------|
| Tp-BDT-AA                                             | 5   | 360                    | 3095                    | 1         |
| MTpPa-1                                               | 2   | 30                     | 1737                    | 2         |
| COF-HNU25                                             | 7   | 8                      | 1725                    | 3         |
| PAF-1-thiourea                                        | 5   | 120                    | 2630                    | 4         |
| NH <sub>2</sub> -CTF-1                                | 7.3 | 20                     | 909                     | 5         |
| COF-TPTD-DHTA-TAB                                     | 5   | 300                    | 2884                    | 6         |
| BTP-DET                                               | 2   | 250                    | 2580.8                  | 7         |
| TTF-COF                                               | 4   | 240                    | 2440                    | 8         |
| PYTA-PZDH-COF                                         | 7   | 240                    | 2314                    | 9         |
| COF-2                                                 | 3   | 480                    | 2081                    | 10        |
| CF-COF                                                | 3   | 95                     | 1895                    | 11        |
| im-PYTA-PZDH-COF                                      | 2   | 720                    | 1558                    | 12        |
| isp <sup>2</sup> c-COF <sub>ox</sub> -NH <sub>2</sub> | 5   | 720                    | 1389                    | 13        |
| COF-An                                                | 3   | 480                    | 1080.7                  | 14        |
| DTDD-MOF                                              | 2   | 600                    | 1119                    | 15        |
| UiO-66-BTU                                            | 4   | 240                    | 680                     | 16        |
| TpDa-COF                                              | 4   | 360                    | 983                     | 17        |
| COF-Q-Pz                                              | 3   | 40                     | 2512.2                  | This work |

## References

- 1 S. Yang, T. Li, Y. Cheng, W. Fan, L. Wang, Y. Liu, L. Bian, C.-H. Zhou, L.-Y. Zheng and Q.-E. Cao, *ACS Sustainable Chem. Eng.*, 2022, **10**, 9719-9731.
- 2 Y. Bai, J. Yang, Q. Shuai and L. Huang, *Colloids Surf. A Physicochem. Eng. Asp.*, 2023, **657**, 130593.
- 3 J. Qiu, C. Xu, X. Xu, Y. Zhao, Y. Zhao, Y. Zhao and J. Wang, *Angew. Chem., Int. Ed.*, 2023, **62**, e202300459.
- 4 T. Ma, R. Zhao, Z. Li, X. Jing, M. Faheem, J. Song, Y. Tian, X. Lv, Q. Shu and G. Zhu, *ACS Appl. Mater. Interfaces*, 2020, **12**, 30474-30482.
- 5 H.-Y. Kong, Y. Tao, X. Ding and B.-H. Han, *Chem. Eng. J.*, 2023, **463**, 142393.
- 6 D. Mei and B. Yan, *ACS Mater. Lett.*, 2024, **7**, 220-228.
- 7 Y.-R. Chen, X.-Y. Fan, H.-F. Wei, L. Liao, Y. Hu, Y. Lu, X. Wang, Y. Li and W.-R. Cui, *Sep. Purif. Technol.*, 2024, **347**, 127521.
- 8 A. Zadehnazari, F. Auras, A. A. Altaf, A. Zarei, A. Khosropour, S. Amirjalayer and A. Abbaspourrad, *Nat. Commun.*, 2024, **15**, 10846.
- 9 X. Yang, D. Jiang, Y. Fu, X. Li, G. Liu, X. Ding, B. H. Han, Q. Xu and G. Zeng, *Small*, 2024, **20**, e2404192.
- 10 K. Li, D. Mei, Y.-s. Liu and B. Yan, *Chem. Mater.*, 2025, **37**, 2535-2545.
- 11 Q. Xu, X.-H. Du, D. Luo, M. Strømme, Q.-F. Zhang and C. Xu, *Chem. Eng. J.*, 2023, **458**, 141498.
- 12 B. Zhu, R. Luo, C. Hou, Y. Gao, Y. Zhang, K. Wang, L. Zhang and J. Luo, *Chem. Eng. J.*, 2024, **497**, 154885.
- 13 Y. Fan, W. Wang, A. Haleem, J. Pan and H. Li, *Sep. Purif. Technol.*, 2025, **353**, 128582.
- 14 L. Zhang, J.-Q. Fan, Q.-Q. Zheng, S.-J. Xiao, C.-R. Zhang, S.-M. Yi, X. Liu, W. Jiang, Q.-G. Tan, R.-P. Liang and J.-D. Qiu, *Chem. Eng. J.*, 2023, **454**, 140212.
- 15 Z. Huang, M. Zhao, C. Wang, S. Wang, L. Dai, L. Zhang and L. Xu, *Chem. Eng. J.*, 2020, **384**, 123343.
- 16 J. Guo, X. Fan, J. Wang, S. Yu, M. Laipan, X. Ren, C. Zhang, L. Zhang and Y. Li, *Chem. Eng. J.*, 2021, **425**, 130588.
- 17 D. Mei and B. Yan, *Angew. Chem., Int. Ed.*, 2024, **63**, e202402205.
